# Supplementary material for: Surgery vs. Radiosurgery for Patients with Localized Metastatic Brain Disease: A Systematic Review with Meta-Analysis of Randomized Controlled Trials
Source: Cancers (Basel). 2023 Jul 26;15(15):3802. doi: 10.3390/cancers15153802 (PMC10417431; doi:10.3390/cancers15153802)
Supplement: Supplementary file 1 [file cancers-15-03802-s001.zip › Table S1.pdf]

Table S1: Risk of Bias

| <b>Unique ID</b>                                          | 1                                                                                                                                                                      | <b>Study ID</b>   | NCT00002899                                                  | <b>Assessor</b>                                                                                                                                                                | L.T. and G.F.                      |
|-----------------------------------------------------------|------------------------------------------------------------------------------------------------------------------------------------------------------------------------|-------------------|--------------------------------------------------------------|--------------------------------------------------------------------------------------------------------------------------------------------------------------------------------|------------------------------------|
| <b>Ref or Label</b>                                       | Churilla et al.                                                                                                                                                        | <b>Aim</b>        | assignment to intervention (the 'intention-to-treat' effect) |                                                                                                                                                                                |                                    |
| <b>Experimental</b>                                       | S/RS + WBRT                                                                                                                                                            | <b>Comparator</b> | S/RS + Observation                                           | <b>Source</b>                                                                                                                                                                  | Journal article(s); Trial protocol |
| <b>Outcome</b>                                            | Overall survival                                                                                                                                                       | <b>Results</b>    |                                                              | <b>Weight</b>                                                                                                                                                                  | 1                                  |
| <b>Domain</b>                                             | <b>Signalling question</b>                                                                                                                                             |                   | <b>Response</b>                                              | <b>Comments</b>                                                                                                                                                                |                                    |
| <b>Bias arising from the randomization process</b>        | 1.1 Was the allocation sequence random?                                                                                                                                |                   | N                                                            | The allocation sequence was random for WBRT and no-WBRT. Therefore, the trial was not randomized for radiosurgery vs surgery, determining a high risk of bias for this domain. |                                    |
|                                                           | 1.2 Was the allocation sequence concealed until participants were enrolled and assigned to interventions?                                                              |                   |                                                              |                                                                                                                                                                                |                                    |
|                                                           | 1.3 Did baseline differences between intervention groups suggest a problem with the randomization process?                                                             |                   |                                                              |                                                                                                                                                                                |                                    |
|                                                           | <b>Risk of bias judgement</b>                                                                                                                                          |                   | <b>High</b>                                                  |                                                                                                                                                                                |                                    |
| <b>Bias due to deviations from intended interventions</b> | 2.1. Were participants aware of their assigned intervention during the trial?                                                                                          |                   | Y                                                            |                                                                                                                                                                                |                                    |
|                                                           | 2.2. Were carers and people delivering the interventions aware of participants' assigned intervention during the trial?                                                |                   | Y                                                            |                                                                                                                                                                                |                                    |
|                                                           | 2.3. If Y/PY/NI to 2.1 or 2.2: Were there deviations from the intended intervention that arose because of the experimental context?                                    |                   | PN                                                           |                                                                                                                                                                                |                                    |
|                                                           | 2.4 If Y/PY to 2.3: Were these deviations likely to have affected the outcome?                                                                                         |                   | NA                                                           |                                                                                                                                                                                |                                    |
|                                                           | 2.5. If Y/PY/NI to 2.4: Were these deviations from intended intervention balanced between groups?                                                                      |                   | NA                                                           |                                                                                                                                                                                |                                    |
|                                                           | 2.6 Was an appropriate analysis used to estimate the effect of assignment to intervention?                                                                             |                   | Y                                                            |                                                                                                                                                                                |                                    |
|                                                           | 2.7 If N/PN/NI to 2.6: Was there potential for a substantial impact (on the result) of the failure to analyse participants in the group to which they were randomized? |                   | NA                                                           |                                                                                                                                                                                |                                    |
|                                                           | <b>Risk of bias judgement</b>                                                                                                                                          |                   | <b>Low</b>                                                   |                                                                                                                                                                                |                                    |
| <b>Bias due to missing outcome data</b>                   | 3.1 Were data for this outcome available for all, or nearly all, participants randomized?                                                                              |                   | N                                                            |                                                                                                                                                                                |                                    |
|                                                           | 3.2 If N/PN/NI to 3.1: Is there evidence that result was not biased by missing outcome data?                                                                           |                   | PY                                                           |                                                                                                                                                                                |                                    |
|                                                           | 3.3 If N/PN to 3.2: Could missingness in the outcome depend on its true value?                                                                                         |                   | NA                                                           |                                                                                                                                                                                |                                    |
|                                                           | 3.4 If Y/PY/NI to 3.3: Is it likely that missingness in the outcome depended on its true value?                                                                        |                   | NA                                                           |                                                                                                                                                                                |                                    |
|                                                           | <b>Risk of bias judgement</b>                                                                                                                                          |                   | <b>Low</b>                                                   |                                                                                                                                                                                |                                    |
| <b>Bias in measurement of the outcome</b>                 | 4.1 Was the method of measuring the outcome inappropriate?                                                                                                             |                   | N                                                            |                                                                                                                                                                                |                                    |
|                                                           | 4.2 Could measurement or ascertainment of the outcome have differed between intervention groups?                                                                       |                   | N                                                            |                                                                                                                                                                                |                                    |

|                                                 |                                                                                                                                                                                     |             |  |
|-------------------------------------------------|-------------------------------------------------------------------------------------------------------------------------------------------------------------------------------------|-------------|--|
|                                                 | 4.3 Were outcome assessors aware of the intervention received by study participants?                                                                                                | Y           |  |
|                                                 | 4.4 If Y/PY/NI to 4.3: Could assessment of the outcome have been influenced by knowledge of intervention received?                                                                  | PN          |  |
|                                                 | 4.5 If Y/PY/NI to 4.4: Is it likely that assessment of the outcome was influenced by knowledge of intervention received?                                                            | NA          |  |
|                                                 | <b>Risk of bias judgement</b>                                                                                                                                                       | <b>Low</b>  |  |
| <b>Bias in selection of the reported result</b> | 5.1 Were the data that produced this result analysed in accordance with a pre-specified analysis plan that was finalized before unblinded outcome data were available for analysis? | Y           |  |
|                                                 | 5.2 ... multiple eligible outcome measurements (e.g. scales, definitions, time points) within the outcome domain?                                                                   | N           |  |
|                                                 | 5.3 ... multiple eligible analyses of the data?                                                                                                                                     | N           |  |
|                                                 | <b>Risk of bias judgement</b>                                                                                                                                                       | <b>Low</b>  |  |
| <b>Overall bias</b>                             | <b>Risk of bias judgement</b>                                                                                                                                                       | <b>High</b> |  |

| Unique ID                                          | 2                                                                                                                                                                      | Study ID   | N/A                                                          | Assessor | L.T. and G.F.      |
|----------------------------------------------------|------------------------------------------------------------------------------------------------------------------------------------------------------------------------|------------|--------------------------------------------------------------|----------|--------------------|
| Ref or Label                                       | Muacevic et al.                                                                                                                                                        | Aim        | assignment to intervention (the 'intention-to-treat' effect) |          |                    |
| Experimental                                       | S + WBRT                                                                                                                                                               | Comparator | RS                                                           | Source   | Journal article(s) |
| Outcome                                            | Overall survival                                                                                                                                                       | Results    |                                                              | Weight   | 1                  |
| Domain                                             | Signalling question                                                                                                                                                    |            | Response                                                     |          | Comments           |
| Bias arising from the randomization process        | 1.1 Was the allocation sequence random?                                                                                                                                |            | Y                                                            |          |                    |
|                                                    | 1.2 Was the allocation sequence concealed until participants were enrolled and assigned to interventions?                                                              |            | Y                                                            |          |                    |
|                                                    | 1.3 Did baseline differences between intervention groups suggest a problem with the randomization process?                                                             |            | N                                                            |          |                    |
|                                                    | Risk of bias judgement                                                                                                                                                 |            | Low                                                          |          |                    |
| Bias due to deviations from intended interventions | 2.1.Were participants aware of their assigned intervention during the trial?                                                                                           |            | Y                                                            |          |                    |
|                                                    | 2.2.Were carers and people delivering the interventions aware of participants' assigned intervention during the trial?                                                 |            | PY                                                           |          |                    |
|                                                    | 2.3. If Y/PY/NI to 2.1 or 2.2: Were there deviations from the intended intervention that arose because of the experimental context?                                    |            | PN                                                           |          |                    |
|                                                    | 2.4 If Y/PY to 2.3: Were these deviations likely to have affected the outcome?                                                                                         |            | NA                                                           |          |                    |
|                                                    | 2.5. If Y/PY/NI to 2.4: Were these deviations from intended intervention balanced between groups?                                                                      |            | NA                                                           |          |                    |
|                                                    | 2.6 Was an appropriate analysis used to estimate the effect of assignment to intervention?                                                                             |            | PY                                                           |          |                    |
|                                                    | 2.7 If N/PN/NI to 2.6: Was there potential for a substantial impact (on the result) of the failure to analyse participants in the group to which they were randomized? |            | NA                                                           |          |                    |
|                                                    | Risk of bias judgement                                                                                                                                                 |            | Low                                                          |          |                    |
| Bias due to missing outcome data                   | 3.1 Were data for this outcome available for all, or nearly all, participants randomized?                                                                              |            | PN                                                           |          |                    |
|                                                    | 3.2 If N/PN/NI to 3.1: Is there evidence that result was not biased by missing outcome data?                                                                           |            | PN                                                           |          |                    |
|                                                    | 3.3 If N/PN to 3.2: Could missingness in the outcome depend on its true value?                                                                                         |            | PN                                                           |          |                    |
|                                                    | 3.4 If Y/PY/NI to 3.3: Is it likely that missingness in the outcome depended on its true value?                                                                        |            | NA                                                           |          |                    |
|                                                    | Risk of bias judgement                                                                                                                                                 |            | Low                                                          |          |                    |
| Bias in measurement of the outcome                 | 4.1 Was the method of measuring the outcome inappropriate?                                                                                                             |            | N                                                            |          |                    |
|                                                    | 4.2 Could measurement or ascertainment of the outcome have differed between intervention groups?                                                                       |            | N                                                            |          |                    |

|                                                 |                                                                                                                                                                                     |                      |  |
|-------------------------------------------------|-------------------------------------------------------------------------------------------------------------------------------------------------------------------------------------|----------------------|--|
|                                                 | 4.3 Were outcome assessors aware of the intervention received by study participants?                                                                                                | Y                    |  |
|                                                 | 4.4 If Y/PY/NI to 4.3: Could assessment of the outcome have been influenced by knowledge of intervention received?                                                                  | PN                   |  |
|                                                 | 4.5 If Y/PY/NI to 4.4: Is it likely that assessment of the outcome was influenced by knowledge of intervention received?                                                            | NA                   |  |
|                                                 | <b>Risk of bias judgement</b>                                                                                                                                                       | <b>Low</b>           |  |
| <b>Bias in selection of the reported result</b> | 5.1 Were the data that produced this result analysed in accordance with a pre-specified analysis plan that was finalized before unblinded outcome data were available for analysis? | N                    |  |
|                                                 | 5.2 ... multiple eligible outcome measurements (e.g. scales, definitions, time points) within the outcome domain?                                                                   | PN                   |  |
|                                                 | 5.3 ... multiple eligible analyses of the data?                                                                                                                                     | N                    |  |
|                                                 | <b>Risk of bias judgement</b>                                                                                                                                                       | <b>Some concerns</b> |  |
| <b>Overall bias</b>                             | <b>Risk of bias judgement</b>                                                                                                                                                       | <b>Some concerns</b> |  |

| <b>Unique ID</b>                                          | 3                                                                                                                       | <b>Study ID</b>   | NCT00124761                                                  | <b>Assessor</b> | L.T. and G.F.                      |
|-----------------------------------------------------------|-------------------------------------------------------------------------------------------------------------------------|-------------------|--------------------------------------------------------------|-----------------|------------------------------------|
| <b>Ref or Label</b>                                       | Roos et al.                                                                                                             | <b>Aim</b>        | assignment to intervention (the 'intention-to-treat' effect) |                 |                                    |
| <b>Experimental</b>                                       | S + WBRT                                                                                                                | <b>Comparator</b> | RS + WBRT                                                    | <b>Source</b>   | Journal article(s); Trial protocol |
| <b>Outcome</b>                                            | Overall survival                                                                                                        | <b>Results</b>    |                                                              | <b>Weight</b>   | 1                                  |
| Domain                                                    | Signalling question                                                                                                     |                   | Response                                                     |                 | Comments                           |
| <b>Bias arising from the randomization process</b>        | 1.1 Was the allocation sequence random?                                                                                 |                   | Y                                                            |                 |                                    |
|                                                           | 1.2 Was the allocation sequence concealed until participants were enrolled and assigned to interventions?               |                   | Y                                                            |                 |                                    |
|                                                           | 1.3 Did baseline differences between intervention groups suggest a problem with the randomization process?              |                   | N                                                            |                 |                                    |
|                                                           | <b>Risk of bias judgement</b>                                                                                           |                   | <b>Low</b>                                                   |                 |                                    |
| <b>Bias due to deviations from intended interventions</b> | 2.1. Were participants aware of their assigned intervention during the trial?                                           |                   | Y                                                            |                 |                                    |
|                                                           | 2.2. Were carers and people delivering the interventions aware of participants' assigned intervention during the trial? |                   | Y                                                            |                 |                                    |

|                                                 |                                                                                                                                                                                     |                      |  |
|-------------------------------------------------|-------------------------------------------------------------------------------------------------------------------------------------------------------------------------------------|----------------------|--|
|                                                 | 2.3. If Y/PY/NI to 2.1 or 2.2: Were there deviations from the intended intervention that arose because of the experimental context?                                                 | PN                   |  |
|                                                 | 2.4 If Y/PY to 2.3: Were these deviations likely to have affected the outcome?                                                                                                      | NA                   |  |
|                                                 | 2.5. If Y/PY/NI to 2.4: Were these deviations from intended intervention balanced between groups?                                                                                   | NA                   |  |
|                                                 | 2.6 Was an appropriate analysis used to estimate the effect of assignment to intervention?                                                                                          | PY                   |  |
|                                                 | 2.7 If N/PN/NI to 2.6: Was there potential for a substantial impact (on the result) of the failure to analyse participants in the group to which they were randomized?              | NA                   |  |
|                                                 | <b>Risk of bias judgement</b>                                                                                                                                                       | <b>Low</b>           |  |
| <b>Bias due to missing outcome data</b>         | 3.1 Were data for this outcome available for all, or nearly all, participants randomized?                                                                                           | N                    |  |
|                                                 | 3.2 If N/PN/NI to 3.1: Is there evidence that result was not biased by missing outcome data?                                                                                        | PN                   |  |
|                                                 | 3.3 If N/PN to 3.2: Could missingness in the outcome depend on its true value?                                                                                                      | PY                   |  |
|                                                 | 3.4 If Y/PY/NI to 3.3: Is it likely that missingness in the outcome depended on its true value?                                                                                     | N                    |  |
|                                                 | <b>Risk of bias judgement</b>                                                                                                                                                       | <b>Some concerns</b> |  |
| <b>Bias in measurement of the outcome</b>       | 4.1 Was the method of measuring the outcome inappropriate?                                                                                                                          | PN                   |  |
|                                                 | 4.2 Could measurement or ascertainment of the outcome have differed between intervention groups?                                                                                    | PN                   |  |
|                                                 | 4.3 Were outcome assessors aware of the intervention received by study participants?                                                                                                | Y                    |  |
|                                                 | 4.4 If Y/PY/NI to 4.3: Could assessment of the outcome have been influenced by knowledge of intervention received?                                                                  | PN                   |  |
|                                                 | 4.5 If Y/PY/NI to 4.4: Is it likely that assessment of the outcome was influenced by knowledge of intervention received?                                                            | NA                   |  |
|                                                 | <b>Risk of bias judgement</b>                                                                                                                                                       | <b>Low</b>           |  |
| <b>Bias in selection of the reported result</b> | 5.1 Were the data that produced this result analysed in accordance with a pre-specified analysis plan that was finalized before unblinded outcome data were available for analysis? | Y                    |  |
|                                                 | 5.2 ... multiple eligible outcome measurements (e.g. scales, definitions, time points) within the outcome domain?                                                                   | N                    |  |
|                                                 | 5.3 ... multiple eligible analyses of the data?                                                                                                                                     | N                    |  |
|                                                 | <b>Risk of bias judgement</b>                                                                                                                                                       | <b>Low</b>           |  |
| <b>Overall bias</b>                             | <b>Risk of bias judgement</b>                                                                                                                                                       | <b>Some concerns</b> |  |
