# Supplementary material for: Surgery vs. Radiosurgery for Patients with Localized Metastatic Brain Disease: A Systematic Review with Meta-Analysis of Randomized Controlled Trials
Source: Cancers (Basel). 2023 Jul 26;15(15):3802. doi: 10.3390/cancers15153802 (PMC10417431; doi:10.3390/cancers15153802)
Supplement: Supplementary file 1 [file cancers-15-03802-s001.zip › Table S2.pdf]

**Table S2. Radiosurgery compared to Surgery for patients with localized metastatic brain disease**

| Certainty assessment                                                                      |                   |                      |                      |                      |                      |                      | Effect                      |                 |                            |                                                       | Certainty                                                                                         |
|-------------------------------------------------------------------------------------------|-------------------|----------------------|----------------------|----------------------|----------------------|----------------------|-----------------------------|-----------------|----------------------------|-------------------------------------------------------|---------------------------------------------------------------------------------------------------|
| No of studies                                                                             | Study design      | Risk of bias         | Inconsistency        | Indirectness         | Imprecision          | Other considerations | Relative (95% CI)           |                 |                            |                                                       |                                                                                                   |
| Overall Survival                                                                          |                   |                      |                      |                      |                      |                      |                             |                 |                            |                                                       |                                                                                                   |
| 3                                                                                         | randomised trials | serious <sup>a</sup> | not serious          | serious <sup>b</sup> | serious <sup>c</sup> | none                 | HR = 1.01 (CIs: 0.44; 2.32) |                 |                            |                                                       | 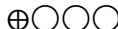<br>Very low   |
| Death Rate at 1 year                                                                      |                   |                      |                      |                      |                      |                      |                             |                 |                            |                                                       |                                                                                                   |
| 3                                                                                         | randomised trials | serious <sup>a</sup> | not serious          | serious <sup>b</sup> | serious <sup>c</sup> | none                 | 101/196 (51.5%)             | 78/157 (49.7%)  | RR 1.03<br>(0.84 to 1.27)  | 15 more per 1,000<br>(from 79 fewer to 134 more)      | 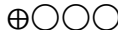<br>Very low   |
| Death Rate at 2 years                                                                     |                   |                      |                      |                      |                      |                      |                             |                 |                            |                                                       |                                                                                                   |
| 3                                                                                         | randomised trials | serious <sup>a</sup> | not serious          | serious <sup>b</sup> | serious <sup>c</sup> | none                 | 144/196 (73.5%)             | 107/157 (68.2%) | RR 1.01<br>(0.61 to 1.68)  | 7 more per 1,000<br>(from 266 fewer to 463 more)      | 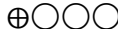<br>Very low   |
| Local Brain Progression Free Survival                                                     |                   |                      |                      |                      |                      |                      |                             |                 |                            |                                                       |                                                                                                   |
| 2                                                                                         | randomised trials | serious <sup>a</sup> | not serious          | serious <sup>b</sup> | serious <sup>c</sup> | none                 | HR = 0.90 (CIs: 0.58; 1.41) |                 |                            |                                                       | <br>Very low   |
| Local Brain Recurrence Rate at 1 year                                                     |                   |                      |                      |                      |                      |                      |                             |                 |                            |                                                       |                                                                                                   |
| 2                                                                                         | randomised trials | serious <sup>a</sup> | serious <sup>d</sup> | serious <sup>b</sup> | serious <sup>c</sup> | none                 | 35/185 (18.9%)              | 50/147 (34.0%)  | RR 0.31<br>(0.04 to 2.42)  | 235 fewer per 1,000<br>(from 327 fewer to 483 more)   | 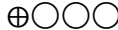<br>Very low   |
| Local Brain Recurrence Rate at 2 years                                                    |                   |                      |                      |                      |                      |                      |                             |                 |                            |                                                       |                                                                                                   |
| 2                                                                                         | randomised trials | serious <sup>a</sup> | not serious          | serious <sup>b</sup> | serious <sup>c</sup> | none                 | 48/185 (25.9%)              | 57/147 (38.8%)  | RR 0.64<br>(0.04 to 10.60) | 140 fewer per 1,000<br>(from 372 fewer to 1,000 more) | <br>Very low |
| Local Brain Progression Free Survival for radiosurgery alone vs surgical resection + WBRT |                   |                      |                      |                      |                      |                      |                             |                 |                            |                                                       |                                                                                                   |
| 2                                                                                         | randomised trials | serious <sup>a</sup> | not serious          | not serious          | serious <sup>c</sup> | none                 | HR = 1.32 (CIs: 0.69; 2.52) |                 |                            |                                                       | 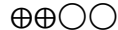<br>Low      |

CI: confidence interval; HR: hazard ratio; RR: risk ratio

## Explanations

- a. Due to lack of randomization for surgery and radiosurgery during patient allocation in Churilla et al.  
b. Due to different employment of WBRT as co-intervention among the included RCTs

- c. Due to underpowering small sample size
- d. Due to serious heterogeneity
